# Supplementary material for: Blended-Learning-Ansatz für die klinische Epileptologie
Source: Springer Nature journal article supplement (doi:10.1007/s10309-023-00623-y), 2023-08-11
Supplement: MOESM1 [file 25913178]

## **Feedback zum digitalen Lernangebot zur Epileptologie – WS21/22 - Dezember**

**Hat Ihnen die Absolvierung des Lernangebots Spaß gemacht?**

- gar nicht
- eher nicht
- eher
- sehr
- Ich weiß nicht

**Hat das Lernangebot den von Ihnen erwarteten Stoff behandelt?**

- gar nicht
- eher nicht
- eher
- sehr
- Ich weiß nicht

**Welche Themen/Inhalte hätten Ihrer Meinung nach behandelt werden sollen, die im Kurs nicht vorkamen?**

Antwort:

**Welche Inhalte/Lernmaterialien sind Ihrer Meinung nach entbehrlich?**

Antwort:

**Hätten Sie sich noch mehr Patientenvideos zur Analyse gewünscht?**

- ja
- nein
- Ich weiß nicht

**Ist die Einbettung des digitalen Lernangebots in das Blockpraktikum Neurologie (Teil: Epileptologie) gelungen?**

- gar nicht
- eher nicht
- eher
- sehr
- Ich weiß nicht

**Empfanden Sie das Lernangebot als klar strukturiert?**

- gar nicht
- eher nicht
- eher
- sehr
- Ich weiß nicht

**Wie relevant war das Lernangebot für ihr Studium?**

- gar nicht
- eher nicht
- eher
- sehr
- Ich weiß nicht

**Was vermuten Sie, wie relevant ist das Lernangebot für Ihre spätere ärztliche Praxis?**

- gar nicht
- eher
- eher nicht
- sehr
- Ich weiß nicht

**Wie fordernd war das Lernangebot für Sie?**

- gar nicht
- eher nicht
- eher
- sehr
- Ich weiß nicht

**Wurden die behandelten Inhalte verständlich erklärt?**

- gar nicht
- eher nicht
- eher
- sehr
- Ich weiß nicht

**Waren die Fragen im Abschlussquiz klar formuliert?**

- gar nicht
- eher nicht
- eher
- sehr
- Ich weiß nicht

**Wie hilfreich war das Feedback zu Ihren Antworten im Quiz?**

- gar nicht
- eher nicht
- eher
- sehr
- Ich weiß nicht

**Wie viel Zeit haben Sie mit diesem Lernangebot verbracht?**

- gar keine Zeit
- bis 15 Minuten
- über 15 bis 30 Minuten
- über 30 bis 45 Minuten
- über 45 bis 60 Minuten
- über 60 bis 75 Minuten
- über 75 bis 90 Minuten
- über 90 Minuten
- Ich weiß nicht

**Wie klar war Ihnen, was Sie tun bzw. worauf Sie klicken müssen, um das Lernangebot zu nutzen?**

- gar nicht
- eher nicht
- eher
- sehr
- Ich weiß nicht

**Hatten Sie Probleme mit der Technik oder mit der Navigation? Wenn ja, welche?**

Antwort:

**Wie sehr hat Ihnen die visuelle Anmutung des Lernangebots gefallen?**

- gar nicht
- eher nicht
- eher
- sehr
- Ich weiß nicht

**Wie lesbar waren die Textpassagen der Lernmodule (Stil und Schriftart)?**

- gar nicht
- eher nicht
- eher
- sehr
- Ich weiß nicht

**Hat das Einstiegsvideo Ihr Interesse am Thema geweckt?**

- gar nicht
- eher nicht
- eher
- sehr
- Ich weiß nicht

**Haben Ihnen die interaktiven Elemente (z. B. Quizfragen) dabei geholfen, die Inhalte zu verinnerlichen?**

- gar nicht
- eher nicht
- eher
- sehr
- Ich weiß nicht

**Wie häufig haben Sie die angebotenen Verlinkungen, z.B. in die Glossare, im Lernangebot genutzt?**

- gar nicht
- 1-3 Mal
- 4-10 Mal
- mehr als 11 Mal
- Ich weiß nicht

**Was nehmen Sie aus dem digitalen Lernangebot mit (Stichpunkte)?**

Antwort:

**Möchten Sie uns noch etwas sagen? Was können wir besser/anders machen?**

Antwort:

**Verraten Sie uns, welche Facharzttrichtung Sie aus Sicht von heute im weiteren Verlauf Ihrer Ausbildung anstreben?**

Antwort:
